# Supplementary material for: Longitudinal genomic surveillance of multidrug-resistant Escherichia coli carriage in critical care patients
Source: bioRxiv or medRxiv preprint supplement (doi:10.1101/2023.08.12.23293895), 2023-08-16

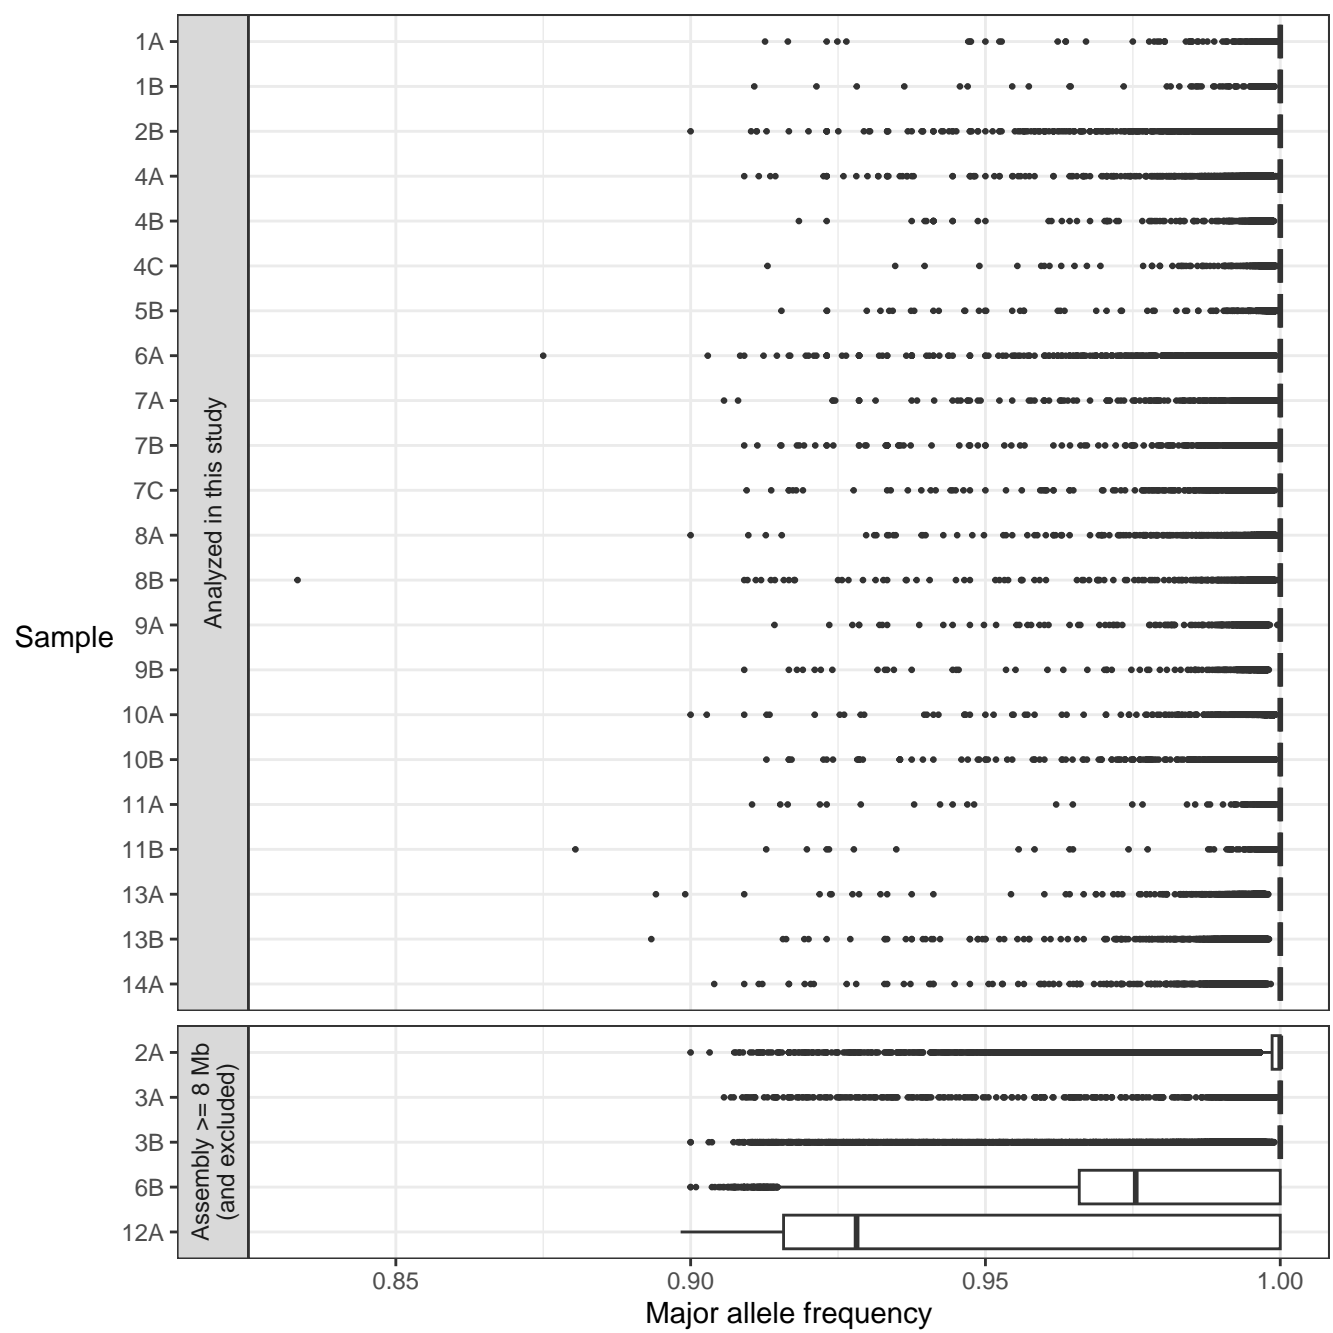

Supplement: Supplementary file [file media-1.pdf]
