# Supplementary material for: Longitudinal genomic surveillance of multidrug-resistant Escherichia coli carriage in critical care patients
Source: bioRxiv or medRxiv preprint supplement (doi:10.1101/2023.08.12.23293895), 2023-08-16
Supplement: Supplementary file [file media-5.pdf]

| Study ID | Gender | Admission Unit       | Cause of admission                            | Foley catheter | Surgery during hospitalization | Recent antibiotics use (within 3 months)                                                       | Antibiotics use during hospitalization                                                                                | First collection date (T0) | Second collection date (T1) | Third collection date (T2) | Reported infection during hospitalization                                                                                                                                                                                                                               |
|----------|--------|----------------------|-----------------------------------------------|----------------|--------------------------------|------------------------------------------------------------------------------------------------|-----------------------------------------------------------------------------------------------------------------------|----------------------------|-----------------------------|----------------------------|-------------------------------------------------------------------------------------------------------------------------------------------------------------------------------------------------------------------------------------------------------------------------|
| MGH 1    | F      | Hematology/ Oncology | Chemotherapy                                  | None           | None                           | Trimethoprim-sulfamethoxazole (TMP-SMX)<br>Ertapenem<br>Piperacillin/tazobactam<br>Teicoplanin | Meropenem                                                                                                             | Nov-21                     | Nov-21                      | N/A                        | Urine: <i>E.coli</i> (ESBL)<br>Blood: <i>P.aeruginosa</i>                                                                                                                                                                                                               |
| MGH 2    | M      | ICU                  | Pneumonia                                     | None           | None                           | N/A                                                                                            | Meropenem<br>Piperacillin/tazobactam<br>Amikacin<br>Vancomycin<br>Levofloxacin                                        | Nov-21                     | Dec-21                      | N/A                        | None                                                                                                                                                                                                                                                                    |
| MGH 3    | F      | Isolation Unit XDR   | Pneumonia                                     | Yes            | Open cholecystectomy           | Ceftriaxone<br>Cefazidime<br>Ampicillin<br>Amoxiclan<br>Cefazidime/Avibactam<br>Vancomycin     | Meropenem<br>Cefazidime/avibactam<br>Amikacin<br>Gentamycin<br>Colistin                                               | Nov-21                     | Dec-21                      | N/A                        | None                                                                                                                                                                                                                                                                    |
| MGH 4    | M      | Hematology/ oncology | Chemotherapy/ Subaralinal bleeding            | Yes            | Craniotomy                     | N/A                                                                                            | Meropenem<br>Vancomycin<br>Colistin                                                                                   | Sep-21                     | Oct-21                      | Oct-21                     | None                                                                                                                                                                                                                                                                    |
| MGH 5    | F      | ICU                  | Pneumonia                                     | Yes            | Bedsores                       | Trimethoprim-sulfamethoxazole (TMP-SMX)<br>Ertapenem<br>Piperacillin/tazobactam<br>Teicoplanin | Meropenem<br>Piperacillin/tazobactam<br>Amikacin<br>Vancomycin<br>Colistin<br>Trimethoprim-sulfamethoxazole           | Oct-21                     | Oct-21                      | N/A                        | DTA: <i>A.baumannii</i> (XDR)-<br><i>P.aeruginosa</i> (XDR)<br>Wound: <i>A. baumannii</i> (XDR)-<br><i>K.pneumoniae</i> (XDR)- <i>E.faecium</i> (VRE)<br>Blood: CoNS                                                                                                    |
| MGH 6    | M      | Hematology/ Oncology | Chemotherapy patient with fever               | None           | None                           | N/A                                                                                            | Cefazidime/avibactam<br>Piperacillin/tazobactam<br>Trimethoprim/Sulfamethoxazole                                      | Aug-21                     | Sep-21                      | N/A                        | None                                                                                                                                                                                                                                                                    |
| MGH 7    | F      | ICU                  | Chemotherapy patient with fever               | Yes            | None                           | N/A                                                                                            | Ceftriaxone<br>Cefazidime/avibactam<br>Meropenem<br>Colistin<br>Levofloxacin                                          | Oct-21                     | Oct-21                      | Oct-21                     | DTA: <i>E.coli</i> (XDR)- <i>S.aureus</i> (MRSA)-<br><i>Candida</i> species- <i>Pseudomonas</i> species<br>Sputum: <i>S.maltophilia</i><br>Blood: <i>E.coli</i> (ESBL)<br>Urine : <i>Candida</i> species                                                                |
| MGH 8    | M      | ICU                  | Pneumonia with septic shock                   | Yes            | None                           | N/A                                                                                            | Meropenem                                                                                                             | Sep-21                     | Oct-21                      | N/A                        | DTA: <i>S. aureus</i>                                                                                                                                                                                                                                                   |
| MGH 9    | F      | Isolation Unit XDR   | Pneumonia                                     | Yes            | None                           | N/A                                                                                            | Ceftriaxone<br>Piperacillin/ tazobactam<br>Levofloxacin<br>Clarithromycin                                             | Nov-21                     | Nov-21                      | N/A                        | None                                                                                                                                                                                                                                                                    |
| MGH 10   | F      | ICU                  | Respiratory failure and septic shock          | Yes:           | Double J insertion             | N/A                                                                                            | Meropenem<br>piperacillin/tazobactam<br>Amikacin<br>Vancomycin<br>Colistin                                            | Oct-21                     | Nov-21                      | N/A                        | DTA: <i>P. aeruginosa</i> (CR) -<br><i>A. baumannii</i> (CRAB) - <i>C. albicans</i><br>Blood: <i>P. aeruginosa</i> (XDR)- CoNS                                                                                                                                          |
| MGH 11   | F      | ICU                  | Pneumonia with septic shock                   | Yes:           | None                           | N/A                                                                                            | Ceftriaxone<br>Cefazidime/avibactam<br>Meropenem<br>Colistin<br>Levofloxacin<br>Clarithromycin                        | Oct-21                     | Nov-21                      | N/A                        | Wound: <i>Candida</i> species                                                                                                                                                                                                                                           |
| MGH 12   | M      | Isolation Unit XDR   | Hemorrhagic shock due to hematuria            | Yes            | Colostomy                      | N/A                                                                                            | Meropenem<br>Piperacillin/tazobactam<br>Colistin<br>Amikacin<br>Vancomycin<br>Teicoplanin                             | Sep-21                     | Sep-21                      | N/A                        | DTA: <i>A.baumannii</i> (XDR)<br><i>P.aeruginosa</i> (XDR)<br>Blood: <i>P.aeruginosa</i> - CoNS<br>Wound: <i>A. baumannii</i> (XDR)-<br><i>P.aeruginosa</i> (XDR)- <i>E. faecium</i> (VRE)<br><i>C. albicans</i><br>Urine: <i>P.aeruginosa</i> (XDR)- <i>E. faecium</i> |
| MGH 13   | M      | ICU                  | Esophageal varices bleeding (liver cirrhosis) | Yes            | None                           | N/A                                                                                            | Ceftriaxone                                                                                                           | Sep-21                     | Sep-21                      | N/A                        | None                                                                                                                                                                                                                                                                    |
| MGH 14   | F      | Isolation Unit XDR   | Septic arteritis                              | Yes            | None                           | N/A                                                                                            | Ceftriaxone<br>Piperacillin/ tazobactam<br>Cefazidime/Avibactam<br>Meropenem<br>Amikacin<br>Vancomycin<br>Teicoplanin | Oct-21                     | Oct-21                      | N/A                        | None                                                                                                                                                                                                                                                                    |
