# Supplementary material for: Longitudinal genomic surveillance of multidrug-resistant Escherichia coli carriage in critical care patients
Source: bioRxiv or medRxiv preprint supplement (doi:10.1101/2023.08.12.23293895), 2023-08-16
Supplement: Supplementary file [file media-6.pdf]

| Isolate # | Type of resistant bacteria | Species perianal colonization | Treatment taken during hospitalization                                                                             | Antibiotic Susceptibility Profile |                 |               |                |                  |                  |                   |                   |                  |                  |                            |                 |               |                 |                 |               |                     |                      |                         |                  |                    |                   |               |
|-----------|----------------------------|-------------------------------|--------------------------------------------------------------------------------------------------------------------|-----------------------------------|-----------------|---------------|----------------|------------------|------------------|-------------------|-------------------|------------------|------------------|----------------------------|-----------------|---------------|-----------------|-----------------|---------------|---------------------|----------------------|-------------------------|------------------|--------------------|-------------------|---------------|
|           |                            |                               |                                                                                                                    | Ampicillin (AMP)                  | Augmentin (AMC) | Tazocin (TZP) | Cefepime (FEP) | Cefoxitin (FOX ) | Cefotaxime (CTX) | Ceftazidime (CAZ) | Ceftriaxone (CRO) | Cefuroxime (CXM) | Cephalothin (CF) | Ceftazidim/Avibactam (CZA) | Ertapenem (ETP) | Imipenem (IM) | Meropenem (MEM) | Gentamycin (GM) | Amikacin (AN) | Ciprofloxacin (CIP) | Nitrofurantoin (NIT) | Trimethyl sulfate (SXT) | Fosfomycin (FOS) | Tetracycline (TET) | Tigecycline (TGC) | Colistin (CL) |
| MGH 1A    | ESBL/CRE                   | <i>E. coli</i>                | <i>Meropenem</i>                                                                                                   | R                                 | R               | R             |                |                  | R                | R                 | R                 | R                | R                |                            |                 | R             | R               | R               |               |                     | R                    |                         | R                |                    |                   |               |
| MGH 1B    | ESBL/CRE                   |                               |                                                                                                                    | R                                 | R               | R             |                |                  | R                | R                 | R                 | R                | R                |                            |                 | R             | R               | R               |               |                     | R                    |                         | R                |                    | R                 |               |
| MGH 2A    | ESBL/CRE                   | <i>E. coli</i>                | <i>Meropenem- Tazocin - Levofloxacin</i>                                                                           | R                                 | R               | R             |                |                  | R                | R                 | R                 | R                | R                |                            |                 | R             | R               | R               | I             |                     | R                    |                         | R                |                    | R                 |               |
| MGH 2B    | ESBL/CRE                   |                               |                                                                                                                    | R                                 | R               | R             | R              | R                | R                | R                 | R                 | R                | R                |                            |                 | R             | R               | R               |               |                     |                      |                         | R                |                    | R                 |               |
| MGH 3A    | ESBL/CRE                   | <i>E. coli</i>                | <i>None</i>                                                                                                        | R                                 | R               |               | R              | R                | R                | R                 | R                 | R                |                  |                            | R               |               |                 | I               |               | R                   |                      |                         |                  | R                  |                   |               |
| MGH 3B    | ESBL/CRE                   |                               |                                                                                                                    | R                                 |                 |               |                | R                |                  |                   | R                 | R                | R                |                            |                 | R             |                 |                 |               |                     |                      |                         | R                |                    | R                 |               |
| MGH 4A    | CRE                        | <i>E. coli</i>                | <i>Meropenem- Colistin</i>                                                                                         |                                   |                 |               |                |                  |                  |                   |                   |                  |                  |                            | R               |               |                 |                 |               |                     |                      |                         | R                |                    |                   |               |
| MGH 4B    | ESBL                       |                               |                                                                                                                    | R                                 | R               |               | I              | I                | R                | R                 | R                 | R                | R                |                            |                 |               |                 |                 |               | R                   |                      | R                       |                  | R                  |                   |               |
| MGH 4C    | ESBL                       |                               |                                                                                                                    | R                                 | R               |               | R              | R                | R                | R                 | R                 | R                | R                |                            |                 |               |                 | R               |               |                     | R                    |                         | R                |                    | R                 |               |
| MGH 5A    | CRAB                       | <i>A.baumannii</i>            | <i>Meropenem -Tazocin- Amikacin</i>                                                                                | R                                 | R               |               |                | R                | R                | R                 | R                 | R                |                  |                            | R               | R             | R               |                 |               |                     |                      | R                       | R                | R                  |                   |               |
| MGH 5B    | ESBL                       | <i>E. coli</i>                | <i>Colistin-Trimethoprim-sulfamethoxazole</i>                                                                      |                                   |                 |               |                | R                | R                | R                 | R                 | R                |                  |                            | R               | R             | R               | R               |               | R                   |                      | R                       |                  |                    |                   |               |
| MGH 6A    | ESBL/CRE                   | <i>E. coli</i>                | <i>Ceftazidime/avibactam- Tazocin</i>                                                                              |                                   |                 |               |                | R                | R                | R                 | R                 | R                |                  |                            | R               | R             | R               |                 |               |                     |                      |                         | R                |                    |                   |               |
| MGH 6B    | ESBL/CRE                   |                               |                                                                                                                    | R                                 | R               | R             | R              | R                | R                | R                 | R                 | R                | R                |                            |                 | R             | R               | R               |               |                     |                      | R                       |                  | R                  |                   | R             |
| MGH 7A    | ESBL                       | <i>E. coli</i>                | <i>Ceftriaxone- Ceftazidime/avibactam- Meropenem- Colistin- Levofloxacin</i>                                       | R                                 | R               |               |                | R                |                  |                   |                   | R                |                  |                            |                 |               |                 |                 |               |                     | R                    |                         | R                |                    |                   |               |
| MGH 7B    | ESBL                       |                               |                                                                                                                    | R                                 |                 |               |                | R                |                  |                   | R                 | R                | R                |                            |                 |               |                 |                 |               |                     |                      | R                       |                  |                    |                   |               |
| MGH 7C    | ESBL                       |                               |                                                                                                                    | R                                 |                 |               |                | R                |                  |                   | R                 | R                | R                |                            |                 |               |                 |                 |               |                     |                      | R                       |                  |                    |                   |               |
| MGH 8A    | ESBL/CRE                   | <i>E. coli</i>                | <i>Meropenem</i>                                                                                                   |                                   |                 |               |                | R                |                  | R                 | R                 | R                |                  |                            | R               |               |                 | I               |               |                     |                      |                         | R                |                    | I                 |               |
| MGH 8B    | ESBL/CRE                   |                               |                                                                                                                    | R                                 | R               |               | I              |                  | R                | R                 | R                 | R                | R                |                            |                 | R             |                 |                 | I             |                     | R                    |                         | R                |                    | R                 |               |
| MGH 9A    | ESBL                       | <i>E. coli</i>                | <i>Ceftriaxone- Tazocin- Levofloxacin- klacid</i>                                                                  | R                                 |                 |               |                | R                | R                | R                 |                   | R                |                  |                            |                 |               |                 |                 |               |                     |                      |                         | R                |                    |                   |               |
| MGH 9B    | ESBL                       |                               |                                                                                                                    | R                                 |                 |               |                | R                | R                | R                 |                   | R                |                  |                            |                 |               |                 |                 | R             |                     |                      |                         |                  | R                  |                   |               |
| MGH 10A   | ESBL/CRE                   | <i>E. coli</i>                | <i>Meropenem- Tazoncin- Amikacin- Colistin</i>                                                                     | R                                 | R               | R             |                |                  | R                |                   | R                 |                  |                  |                            | R               | R             | R               | R               |               | R                   |                      | R                       |                  | R                  |                   |               |
| MGH 10B   | ESBL/CRE                   |                               |                                                                                                                    | R                                 | R               | R             |                |                  | R                |                   | R                 |                  | R                |                            |                 | R             | R               | R               | R             |                     | R                    |                         | R                |                    | R                 |               |
| MGH 11A   | ESBL                       | <i>E. coli</i>                | <i>Ceftriaxone- Ceftazidime/avibactam- Meropenem- Colistin- Levofloxacin- klacid</i>                               | R                                 |                 |               |                | R                |                  |                   | R                 | R                |                  |                            |                 |               |                 |                 |               |                     |                      |                         |                  |                    |                   |               |
| MGH 11B   | ESBL                       |                               |                                                                                                                    | R                                 |                 |               |                | R                |                  |                   | R                 | R                |                  |                            |                 |               |                 |                 |               |                     |                      |                         |                  |                    |                   |               |
| MGH 12A   | ESBL                       | <i>E. coli</i>                | <i>Meropenem- Piperacillin/tazobactam Colistin-Amikacin- Vancomycin- Teicoplanin</i>                               | R                                 | R               | R             | R              |                  | R                | R                 | R                 | R                | R                |                            |                 |               |                 | I               |               | R                   |                      | R                       |                  | R                  |                   |               |
| MGH 12B   | ESBL                       |                               |                                                                                                                    | R                                 | R               | R             | R              |                  | R                | R                 | R                 | R                | R                |                            |                 |               |                 |                 | I             |                     | R                    |                         | R                |                    | R                 |               |
| MGH 13A   | ESBL                       | <i>E. coli</i>                | <i>Ceftriaxone</i>                                                                                                 | R                                 |                 |               |                | R                |                  | R                 | R                 | R                |                  |                            |                 |               |                 |                 |               |                     |                      |                         |                  |                    |                   |               |
| MGH 13B   | ESBL                       |                               |                                                                                                                    | R                                 | R               |               |                | R                | R                | R                 | R                 | R                |                  |                            |                 |               |                 |                 | R             |                     | R                    |                         |                  | R                  |                   | R             |
| MGH 14A   | ESBL                       | <i>E. coli</i>                | <i>Ceftriaxone- Piperacillin/ tazobactam- Ceftazidime/Avibactam- Meropenem- Amikacin- Vancomycin - Teicoplanin</i> | R                                 | R               |               | I              |                  | R                |                   | R                 | R                | R                |                            |                 |               |                 |                 |               | R                   |                      | R                       |                  | R                  |                   |               |
| MGH 14B   | ESBL                       |                               |                                                                                                                    | R                                 | R               |               | I              |                  | R                |                   | R                 | R                | R                |                            |                 |               |                 |                 |               |                     | R                    |                         | R                |                    | R                 |               |
