# Supplementary material for: Longitudinal genomic surveillance of multidrug-resistant Escherichia coli carriage in critical care patients
Source: bioRxiv or medRxiv preprint supplement (doi:10.1101/2023.08.12.23293895), 2023-08-16
Supplement: Supplementary file [file media-7.pdf]

| Patient #                              | Position | Type of variant | Nucleotide changes                                           | Gene associated with open reading frame             |
|----------------------------------------|----------|-----------------|--------------------------------------------------------------|-----------------------------------------------------|
| MGH 1<br>Isolate at T1 compared to T0  | 133781   | SNV             | C>T                                                          | Non-Coding                                          |
|                                        | 643      | SNV             | G>A                                                          | Synonymous_variant - Hypothetical protein           |
|                                        | 13       | SNV             | T>C                                                          | Non-Coding                                          |
|                                        | 30       | SNV             | A>G                                                          | Non-Coding                                          |
|                                        | 36       | SNV             | A>G                                                          | Non-Coding                                          |
|                                        | 80956    | Complex         | CGAT=>TGAC                                                   | Synonymous_variant - ISAs1 family transposase ISEc1 |
|                                        | 14629    | SNV             | C>T                                                          | Non-Coding                                          |
|                                        | 14666    | SNV             | C>T                                                          | Non-Coding                                          |
|                                        | 870      | SNV             | A>T                                                          | Non-Coding                                          |
|                                        | 923      | SNV             | C>T                                                          | Non-Coding                                          |
|                                        | 1025     | SNV             | T>C                                                          | Synonymous_variant - ISAs1 family transposase ISEc1 |
|                                        | 3031     | Complex         | CAACT=>AAACC                                                 | Missense_variant - ISAs1 family transposase ISEc5   |
|                                        | 48       | SNV             | C>T                                                          | Non-Coding                                          |
|                                        | 56       | SNV             | T>C                                                          | Non-Coding                                          |
| MGH 4<br>Isolate at T2 compared to T1  | 133573   | SNV             | C>T                                                          | Non-Coding                                          |
|                                        | 204751   | INS             | A=>ACGGTCAG                                                  | Frameshift_variant - ompF Outer membrane porin F    |
|                                        | 419      | SNV             | T>A                                                          | Non-Coding                                          |
|                                        | 156833   | SNV             | T>G                                                          | Non-Coding                                          |
|                                        | 39553    | Complex         | ATCG=>GTCA                                                   | Synonymous_variant - ISAs1 family transposase ISEc1 |
|                                        | 108554   | SNV             | T>C                                                          | Non-Coding                                          |
|                                        | 108560   | SNV             | T>C                                                          | Non-Coding                                          |
|                                        | 108577   | SNV             | A>G                                                          | Non-Coding                                          |
|                                        | 2120     | SNV             | C>A                                                          | Missense_variant - Hypothetical protein             |
|                                        | 1257     | SNV             | C>T                                                          | Synonymous_variant - Hypothetical protein           |
|                                        | 1269     | SNV             | C>T                                                          | Synonymous_variant - Hypothetical protein           |
|                                        | 1275     | SNV             | C>T                                                          | Synonymous_variant - Hypothetical protein           |
|                                        | 57894    | SNV             | A>G                                                          | Non-Coding                                          |
|                                        | 42632    | Complex         | AGTTG=>GGTTT                                                 | Missense_variant - ISAs1 family transposase ISEc5   |
| 343                                    | SNV      | A>G             | Non-Coding                                                   |                                                     |
| MGH 7<br>Isolate at T2 compared to T1  | 59359    | SNV             | A>G                                                          | Synonymous_variant - yjld_1 putative protein Yjld   |
|                                        | 59368    | SNV             | T>C                                                          | Synonymous_variant - yjld_1 putative protein Yjld   |
|                                        | 59390    | SNV             | T>G                                                          | Missense_variant - yjld_1 putative protein Yjld     |
|                                        | 74834    | SNV             | G>A                                                          | Synonymous_variant - yjld_2 putative protein Yjld   |
|                                        | 4458     | SNV             | T>C                                                          | Non-Coding                                          |
|                                        | 10569    | INS             | T=>TTGTTTC                                                   | Insertion - Hypothetical protein                    |
|                                        | 2910     | SNV             | C>T                                                          | Missense_variant - IS1 family transposase IS1X2     |
|                                        | 333      | SNV             | A>G                                                          | Missense_variant - IS3 family transposase IS2       |
|                                        | 415      | SNV             | T>C                                                          | Synonymous_variant - IS3 family transposase IS2     |
|                                        | 16368    | SNV             | A>T                                                          | Non-Coding                                          |
|                                        | 1385     | SNV             | A>G                                                          | Missense_variant - Hypothetical protein             |
|                                        | 1436     | SNV             | T>C                                                          | Missense_variant - Hypothetical protein             |
|                                        | 90       | SNV             | C>T                                                          | Non-Coding                                          |
|                                        | 114      | SNV             | A>T                                                          | Non-Coding                                          |
|                                        | 135      | Complex         | TGGC=>CGGT                                                   | Non-Coding                                          |
|                                        | 156      | Complex         | AGCT=>GGCA                                                   | Non-Coding                                          |
|                                        | 196      | SNV             | T>C                                                          | Non-Coding                                          |
|                                        | 252      | SNV             | T>A                                                          | Non-Coding                                          |
|                                        | 444      | SNV             | A>G                                                          | Synonymous_variant - Hypothetical protein           |
|                                        | 469      | SNV             | C>T                                                          | Missense_variant - Hypothetical protein             |
| 163                                    | SNV      | T>C             | Synonymous_variant - Hypothetical protein                    |                                                     |
| 752                                    | SNV      | C>T             | Non-Coding                                                   |                                                     |
| MGH 8<br>Isolate at T1 compared to T0  | 2078     | SNV             | A>G                                                          | Synonymous_variant - Hypothetical protein           |
|                                        | 2156     | SNV             | A>T                                                          | Synonymous_variant - Hypothetical protein           |
|                                        | 21976    | SNV             | G>A                                                          | Missense_variant - Hypothetical protein             |
|                                        | 39631    | SNV             | G>A                                                          | Synonymous_variant - yjld_1 putative protein        |
|                                        | 8908     | SNV             | G>C                                                          | Missense_variant - Antigen 43                       |
|                                        | 9029     | SNV             | T>A                                                          | Synonymous_variant - Antigen 43                     |
|                                        | 9044     | SNV             | G>T                                                          | Synonymous_variant - Antigen 43                     |
|                                        | 11429    | SNV             | A>G                                                          | Missense_variant - Hypothetical protein             |
|                                        | 5424     | SNV             | G>A                                                          | Non-Coding                                          |
|                                        | 23877    | SNV             | G>A                                                          | Non-Coding                                          |
|                                        | 7024     | SNV             | C>T                                                          | Synonymous_variant - Hypothetical protein           |
|                                        | 7031     | SNV             | T>C                                                          | Missense_variant - Hypothetical protein             |
|                                        | 7036     | SNV             | A>G                                                          | Synonymous_variant - Hypothetical protein           |
|                                        | 7200     | SNV             | G>A                                                          | Missense_variant - hypothetical protein             |
|                                        | 7258     | SNV             | C>T                                                          | Synonymous_variant - Antigen 43                     |
|                                        | 7290     | SNV             | T>C                                                          | Missense_variant - Antigen 43                       |
| 7297                                   | SNV      | T>A             | Synonymous_variant - Antigen 43                              |                                                     |
| 4303                                   | SNV      | C>A             | Non-Coding                                                   |                                                     |
| MGH 9<br>Isolate at T1 compared to T0  | 127929   | SNV             | C>T                                                          | Missense_variant - Hypothetical protein             |
|                                        | 75380    | SNV             | T>C                                                          | Non-Coding                                          |
|                                        | 71980    | SNV             | T>G                                                          | Non-Coding                                          |
|                                        | 4205     | SNV             | T>G                                                          | Synonymous_variant - Hypothetical protein           |
|                                        | 21       | SNV             | T>C                                                          | Non-Coding                                          |
|                                        | 38       | SNV             | A>G                                                          | Non-Coding                                          |
|                                        | 44       | SNV             | A>G                                                          | Non-Coding                                          |
|                                        | 18231    | SNV             | G>T                                                          | Synonymous_variant - Hypothetical protein           |
|                                        | 18240    | SNV             | G>T                                                          | Synonymous_variant - Hypothetical protein           |
|                                        | 18252    | SNV             | G>A                                                          | Synonymous_variant - Hypothetical protein           |
|                                        | 12127    | SNV             | G>C                                                          | Non-Coding                                          |
|                                        | 1495     | SNV             | A>G                                                          | Missense_variant - hypothetical protein             |
|                                        | 3758     | SNV             | T>C                                                          | Non-Coding                                          |
|                                        | 2948     | Complex         | TCG=>CCC                                                     | Non-Coding                                          |
|                                        | 30       | SNV             | A>G                                                          | Non-Coding                                          |
|                                        | 41       | SNV             | T>C                                                          | Non-Coding                                          |
|                                        | 54       | SNV             | G>T                                                          | Non-Coding                                          |
|                                        | 64       | Complex         | CTC=>TTT                                                     | Non-Coding                                          |
| 899                                    | SNV      | C>A             | Missense_variant - traD_2 Coupling protein                   |                                                     |
| 909                                    | SNV      | G>A             | Missense_variant - traD_2 Coupling protein                   |                                                     |
| 1059                                   | SNV      | C>T             | Non-Coding                                                   |                                                     |
| 627                                    | Complex  | CTGG=>ATGA      | Non-Coding                                                   |                                                     |
| 642                                    | SNV      | A>G             | Non-Coding                                                   |                                                     |
| 334                                    | SNV      | A>G             | Non-Coding                                                   |                                                     |
| 342                                    | Complex  | CGGT=>AGGC      | Non-Coding                                                   |                                                     |
| 264                                    | SNV      | G>A             | Non-Coding                                                   |                                                     |
| MGH 10<br>Isolate at T1 compared to T0 | 15595    | SNV             | C>T                                                          | Synonymous_variant - Hypothetical protein           |
|                                        | 15610    | Complex         | ATCGTCGAGG=>GTCATCCAGC                                       | Synonymous_variant - Hypothetical protein           |
|                                        | 15661    | SNV             | A>G                                                          | Synonymous_variant - Hypothetical protein           |
|                                        | 15685    | SNV             | A>G                                                          | Synonymous_variant - Hypothetical protein           |
|                                        | 116423   | SNV             | A>G                                                          | Non-Coding                                          |
|                                        | 21091    | SNV             | C>T                                                          | Synonymous_variant - Small toxic polypeptide LdrD   |
|                                        | 21100    | SNV             | G>A                                                          | Synonymous_variant - Small toxic polypeptide LdrD   |
|                                        | 10454    | SNV             | G>T                                                          | Non-Coding                                          |
|                                        | 10524    | SNV             | A>T                                                          | Non-Coding                                          |
|                                        | 19817    | SNV             | C>T                                                          | Synonymous_variant - DNA primase                    |
| 1006                                   | SNV      | T>C             | Missense_variant - Cytoskeleton bundling-enhancing antitoxin |                                                     |
| 2014                                   | SNV      | G>A             | Synonymous_variant - Tyrosine recombinase XerC               |                                                     |
| MGH 11<br>Isolate at T1 compared to T0 | 123449   | SNV             | G>A                                                          | Missense_variant - D-alanine-D-alanine ligase A     |
|                                        | 68938    | Complex         | ACAGGT=>TCAGAC                                               | Missense_variant - Hypothetical protein             |
|                                        | 69660    | SNV             | A>G                                                          | Non-Coding                                          |
|                                        | 69697    | SNV             | A>G                                                          | Non-Coding                                          |
|                                        | 1140     | SNV             | A>T                                                          | Non-Coding                                          |
|                                        | 1300     | Complex         | CTGTG=>GTGTA                                                 | Non-Coding                                          |
|                                        | 1316     | SNV             | T>C                                                          | Non-Coding                                          |
|                                        | 15488    | SNV             | A>C                                                          | Non-Coding                                          |
|                                        | 17654    | SNV             | A>G                                                          | Synonymous_variant - Hypothetical protein           |
|                                        | 43271    | SNV             | T>C                                                          | Non-Coding                                          |
|                                        | 42118    | Complex         | AGTTG=>GGTTT                                                 | Missense_variant - ISAs1 family transposase ISEc5   |
| 48                                     | SNV      | C>T             | Non-Coding                                                   |                                                     |
| 56                                     | SNV      | T>C             | Non-Coding                                                   |                                                     |

NB: The isolates that have > 1000 variants in MGH 4 (T1 versus T0), MGH7 (T1 versus T0) and MGH 13 (T1 versus T0) were not included in the table since the strains had major differences in the genomic content  
SNV is the abbreviation of single nucleotide polymorphism, and INS is the abbreviation of insertion and complex is the abbreviation of combination of SNV
